# Supplementary material for: Long-term safety and efficacy of sarilumab plus methotrexate on disease activity, physical function and radiographic progression: 5 years of sarilumab plus methotrexate treatment
Source: PubMed Central journal article supplement — RMD Open. 2019 Aug 1;5(2):e000887. doi: 10.1136/rmdopen-2018-000887 (PMC6691511; doi:10.1136/rmdopen-2018-000887), 2019-08-01
Supplement: rmdopen-2018-000887supp001.pdf [file rmdopen-2018-000887supp001.pdf]

## SUPPLEMENTARY MATERIAL

**Supplementary table 1** Demographics and patient characteristics at entry into the open-label extension, by original randomisation group

| Parameter at open-label extension baseline    | Open-label extension     |                     |                   |
|-----------------------------------------------|--------------------------|---------------------|-------------------|
|                                               | Placebo + MTX<br>(N=307) | Sarilumab q2w + MTX |                   |
|                                               |                          | 150 mg<br>(N=300)   | 200 mg<br>(N=294) |
| Female, n (%)                                 | 246 (80)                 | 241 (80)            | 246 (84)          |
| Age, mean (SD), years                         | 51.8 (10.7)              | 51.3 (11.8)         | 51.2 (11.6)       |
| Weight, mean (SD), kg                         | 75.3 (17.4)              | 75.5 (18.4)         | 76.4 (19.5)       |
| Body mass index, mean (SD), kg/m <sup>2</sup> | 28.6 (6.0)               | 28.6 (6.3)          | 29.2 (6.5)        |
| <b>Region, n (%)*</b>                         |                          |                     |                   |
| Region 1                                      | 45 (15)                  | 55 (18)             | 52 (18)           |
| Region 2                                      | 129 (42)                 | 126 (42)            | 119 (41)          |
| Region 3                                      | 133 (43)                 | 119 (40)            | 123 (42)          |
| <b>Smoking status, n (%)</b>                  |                          |                     |                   |
| Never                                         | 229 (75)                 | 225 (75)            | 225 (77)          |
| Former                                        | 39 (13)                  | 30 (10)             | 33 (11)           |
| Current                                       | 37 (12)                  | 45 (15)             | 35 (12)           |
| <b>Alcohol habits</b>                         |                          |                     |                   |
| Never                                         | 241 (79)                 | 237 (79)            | 245 (84)          |
| At least monthly                              | 41 (13)                  | 38 (13)             | 33 (11)           |
| At least weekly                               | 21 (7)                   | 22 (7)              | 14 (5)            |
| At least daily                                | 3 (1)                    | 3 (1)               | 1 (0.3)           |

\*Region 1: Austria, Australia, Belgium, Canada, Czech Republic, Finland, Germany, Greece, Hungary, Italy, Israel, The Netherlands, New Zealand, Norway, Portugal, Spain, Sweden, United Kingdom, USA; Region 2: Argentina, Brazil, Chile, Colombia, Ecuador, Guatemala, Mexico, Peru; Region 3: Belarus, Estonia, India, Lithuania, Malaysia, Philippines, Poland, Romania, Russia, South Africa, South Korea, Ukraine, Taiwan, Thailand, Turkey.

| <b>Supplementary table 2</b> Duration of sarilumab treatment               |                                    |                                     |                           |
|----------------------------------------------------------------------------|------------------------------------|-------------------------------------|---------------------------|
| <b>Sarilumab treatment</b>                                                 | <b>Sarilumab + methotrexate</b>    |                                     |                           |
|                                                                            | <b>150 mg initial dose (n=400)</b> | <b>200 mg initial dose* (n=735)</b> | <b>Any dose† (n=1135)</b> |
| <b>Cumulative exposure to treatment, PY</b>                                | 346.1                              | 2050.4                              | 3766.5                    |
| <b>Number of patients with duration of study treatment by category (%)</b> |                                    |                                     |                           |
| ≥1 day                                                                     | 400 (100)                          | 735 (100)                           | 1135 (100)                |
| >12 weeks                                                                  | 368 (92.0)                         | 665 (90.5)                          | 1050 (92.5)               |
| >24 weeks                                                                  | 308 (77.0)                         | 629 (85.6)                          | 1003 (88.4)               |
| >48 weeks                                                                  | 274 (68.5)                         | 537 (73.1)                          | 900 (79.3)                |
| >96 weeks                                                                  | 7 (1.8)                            | 416 (56.6)                          | 768 (67.7)                |
| >144 weeks                                                                 | 6 (1.5)                            | 363 (49.4)                          | 702 (61.9)                |
| >192 weeks                                                                 | 6 (1.5)                            | 336 (45.7)                          | 653 (57.5)                |
| >240 weeks                                                                 | 5 (1.3)                            | 218 (29.7)                          | 476 (41.9)                |

\*Including placebo patients from the double-blind phase who switched to sarilumab 200 mg in the open-label extension.

†Any dose includes exposure on all sarilumab doses.

PY, patient-years

**Supplementary table 3** Investigator-reported treatment-emergent AEs of special interest

| AEs of special interest                           | <i>n<sub>E</sub></i> ( <i>n<sub>E</sub></i> /100 PY) |                                     |                           |
|---------------------------------------------------|------------------------------------------------------|-------------------------------------|---------------------------|
|                                                   | Sarilumab 150 mg initial dose + MTX                  | Sarilumab 200 mg initial dose*+ MTX | Any sarilumab dose† + MTX |
| <b>Cumulative total AE observation period, PY</b> | 355.5                                                | 2082.5                              | 3826.0                    |
| Infections                                        | 289 (81.3)                                           | 1128 (54.2)                         | 2109 (55.1)               |
| Serious infections                                | 14 (3.9)                                             | 82 (3.9)                            | 148 (3.9)                 |
| <b>Opportunistic infections</b>                   | 2 (0.6)                                              | 20 (1.0)                            | 37 (1.0)                  |
| Herpes zoster‡                                    | 1 (0.3)                                              | 13 (0.6)                            | 20 (0.5)                  |
| Tuberculosis§                                     | 0                                                    | 0                                   | 1 (<0.1)                  |
| Leucopenia                                        | 88 (24.8)                                            | 343 (16.5)                          | 676 (17.7)                |
| Thrombocytopenia                                  | 5 (1.4)                                              | 26 (1.2)                            | 54 (1.4)                  |
| Hepatic disorders                                 | 66 (18.6)                                            | 199 (9.6)                           | 372 (9.7)                 |
| <b>Confirmed GI perforation¶</b>                  | 1 (0.3)                                              | 3 (0.1)                             | 5 (0.1)                   |
| Upper                                             | 1 (0.3)                                              | 1 (<0.1)                            | 2 (<0.1)                  |
| Lower                                             | 0                                                    | 2 (<0.1)                            | 3 (<0.1)                  |
| GI ulcerations                                    | 7 (2.0)                                              | 7 (0.3)                             | 18 (0.5)                  |
| Elevation in lipids                               | 19 (5.3)                                             | 134 (6.4)                           | 215 (5.6)                 |
| <b>Hypersensitivity</b>                           | 36 (10.1)                                            | 89 (4.3)                            | 189 (4.9)                 |
| Anaphylaxis                                       | 0                                                    | 0                                   | 0                         |
| Injection-site reactions                          | 124 (34.9)                                           | 456 (21.9)                          | 828 (21.6)                |
| <b>Malignancy</b>                                 | 4 (1.1)                                              | 16 (0.8)                            | 24 (0.6)                  |
| Malignancy excluding NMSC                         | 4 (1.1)                                              | 10 (0.5)                            | 18 (0.5)                  |
| MACE                                              | 2 (0.6)                                              | 7 (0.3)                             | 13 (0.3)                  |
| Lupus-like syndrome                               | 1 (0.3)                                              | 1 (0.0)                             | 2 (0.1)                   |
| Demyelinating disorders                           | 0                                                    | 0                                   | 0                         |

Investigator-reported treatment-emergent AEs of special interest are presented for the entire 5-year period.

\*Including placebo patients from the double-blind phase who switched to sarilumab 200 mg in the open-label extension.

†Any dose includes exposure on all sarilumab doses.

‡Herpes zoster was reported as an opportunistic infection per protocol requirement; all cases of herpes zoster were localised.

§All cases of tuberculosis were reported as opportunistic infections.

||Cases were medically reviewed.

AE, adverse event; GI, gastrointestinal; MACE, major adverse cardiovascular events; MTX, methotrexate;  $n_E$ , number of events;  $n_E/100$  PY, number of events per 100 PY; NMSC, nonmelanoma skin cancer; PY, patient-years.

| <b>Supplementary table 4</b> Laboratory abnormalities over 5 years of follow-up |                                                | <b>Sarilumab + methotrexate, n (%)</b>      |                               |  |
|---------------------------------------------------------------------------------|------------------------------------------------|---------------------------------------------|-------------------------------|--|
| <b>Laboratory parameter</b>                                                     |                                                |                                             |                               |  |
|                                                                                 | <b>150 mg<br/>initial<br/>dose<br/>(n=400)</b> | <b>200 mg<br/>initial dose*<br/>(n=735)</b> | <b>Any dose†<br/>(n=1135)</b> |  |
| <b>ANC</b>                                                                      |                                                |                                             |                               |  |
| Patients with ANC <1000 cells/mm <sup>3</sup>                                   | 24 (6.0)                                       | 86 (11.7)                                   | 143 (12.6)                    |  |
| Normalised on treatment‡                                                        | 15 (3.8)                                       | 41 (5.6)                                    | 104 (9.2)                     |  |
| Normalised after the last dose                                                  | 5 (1.3)                                        | 13 (1.8)                                    | 27 (2.4)                      |  |
| Did not normalise after the last episode                                        | 4 (1.0)                                        | 32 (4.4)                                    | 12 (1.1)                      |  |
| Treatment continuing§                                                           | 3 (0.8)                                        | 29 (4.0)                                    | 3 (0.3)                       |  |
| Treatment discontinued – last value available                                   | 1 (0.3)                                        | 3 (0.4)                                     | 9 (0.8)                       |  |
| Grade 1: ≥1500 cells/mm <sup>3</sup>                                            | 0                                              | 0                                           | 0                             |  |
| Grade 2: ≥1000–<1500 cells/mm <sup>3</sup>                                      | 0                                              | 2 (0.3)                                     | 5 (0.4)                       |  |
| Grade 3/4: <1000 cells/mm <sup>3</sup>                                          | 1 (0.3)                                        | 1 (0.1)                                     | 4 (0.4)                       |  |
| <b>ALT</b>                                                                      |                                                |                                             |                               |  |
| Patients with ALT >3× ULN                                                       | 39 (9.8)                                       | 87 (11.9)                                   | 158 (14.0)                    |  |
| Normalised on treatment‡                                                        | 19 (4.8)                                       | 28 (3.8)                                    | 84 (7.4)                      |  |
| Normalised after the last dose                                                  | 8 (2.0)                                        | 19 (2.6)                                    | 33 (2.9)                      |  |
| Did not normalise after the last episode                                        | 12 (3.0)                                       | 40 (5.5)                                    | 41 (3.6)                      |  |
| Treatment continuing§                                                           | 6 (1.5)                                        | 24 (3.3)                                    | 12 (1.1)                      |  |
| Treatment discontinued – last value available                                   | 6 (1.5)                                        | 16 (2.2)                                    | 29 (2.6)                      |  |
| ALT: 1–1.5× ULN                                                                 | 2 (0.5)                                        | 5 (0.7)                                     | 12 (1.1)                      |  |
| ALT: 1.5–3× ULN                                                                 | 3 (0.8)                                        | 8 (1.1)                                     | 13 (1.1)                      |  |
| ALT: >3× ULN                                                                    | 1 (0.3)                                        | 3 (0.4)                                     | 4 (0.4)                       |  |
| <b>Platelet count</b>                                                           |                                                |                                             |                               |  |
| Patients with platelet count <100 × 10 <sup>9</sup> cells/L                     | 4 (1.0)                                        | 18 (2.5)                                    | 33 (2.9)                      |  |
| Normalised on treatment‡                                                        | 2 (0.5)                                        | 12 (1.6)                                    | 20 (1.8)                      |  |
| Normalised after the last dose                                                  | 1 (0.3)                                        | 2 (0.3)                                     | 6 (0.5)                       |  |
| Did not normalise after the last episode                                        | 1 (0.3)                                        | 4 (0.5)                                     | 7 (0.6)                       |  |
| Treatment continuing§                                                           | 0                                              | 2 (0.3)                                     | 4 (0.4)                       |  |

|                                                          |         |         |         |
|----------------------------------------------------------|---------|---------|---------|
| Treatment discontinued – last value available            | 1 (0.3) | 2 (0.3) | 3 (0.3) |
| Platelet count $\geq 50\text{--}100 \times 10^9$ cells/L | 1 (0.3) | 1 (0.1) | 2 (0.2) |
| Platelet count $< 50 \times 10^9$ cells/L                | 0       | 0       | 0       |

Laboratory abnormalities are presented for the entire 5-year period.

\*Including placebo patients from the double-blind phase who switched to sarilumab 200 mg in the open-label extension.

†Any dose includes exposure on all sarilumab doses.

‡End of treatment defined as  $\leq 17$  days after date of last dose of investigational medicinal product.

§Patient was still in the study at time of data extraction

ALT, alanine aminotransferase; ANC, absolute neutrophil count; ULN, upper limit of normal.

**Supplementary table 5** Incidence of infection and serious infection by lowest on-study ANC

| Lowest on-study ANC (neutropenia grade)     | Sarilumab + methotrexate, n <sub>i</sub> /n <sub>c</sub> (%) |                              |                    |
|---------------------------------------------|--------------------------------------------------------------|------------------------------|--------------------|
|                                             | 150 mg initial dose (n=400)                                  | 200 mg initial dose* (n=735) | Any dose† (n=1135) |
| <b>Any infection</b>                        |                                                              |                              |                    |
| ≥LLN                                        | 115/267 (43.1)                                               | 200/339 (59.0)               | 322/529 (60.9)     |
| <LLN                                        | 55/133 (41.4)                                                | 214/393 (54.5)               | 386/603 (64.0)     |
| ≥1500 cells/mm <sup>3</sup> – LLN (grade 1) | 22/54 (40.7)                                                 | 88/152 (57.9)                | 145/218 (66.5)     |
| ≥1000–<1500 cells/mm <sup>3</sup> (grade 2) | 23/55 (41.8)                                                 | 92/155 (59.4)                | 156/242 (64.5)     |
| ≥500–<1000 cells/mm <sup>3</sup> (grade 3)  | 10/20 (50.0)                                                 | 30/80 (37.5)                 | 78/128 (60.9)      |
| <500 cells/mm <sup>3</sup> (grade 4)        | 0/4 (0)                                                      | 4/6 (66.7)                   | 7/15 (46.7)        |
| <b>Serious infection</b>                    |                                                              |                              |                    |
| ≥LLN                                        | 7/267 (2.6)                                                  | 28/339 (8.3)                 | 52/529 (9.8)       |
| <LLN                                        | 4/133 (3.0)                                                  | 41/393 (10.4)                | 66/603 (10.9)      |
| ≥1500 cells/mm <sup>3</sup> – LLN (grade 1) | 3/54 (5.6)                                                   | 20/152 (13.2)                | 32/218 (14.7)      |
| ≥1000–<1500 cells/mm <sup>3</sup> (grade 2) | 1/55 (1.8)                                                   | 18/155 (11.6)                | 26/242 (10.7)      |
| ≥500–<1000 cells/mm <sup>3</sup> (grade 3)  | 0/20                                                         | 3/80 (3.8)                   | 7/128 (5.5)        |
| <500 cells/mm <sup>3</sup> (grade 4)        | 0/4                                                          | 0/6                          | 1/15 (6.7)         |

Incidence of infection and serious infection by lowest on-study ANC are presented for the entire 5-year period.

\*Including placebo patients from the double-blind phase who switched to sarilumab 200 mg in the open-label extension.

†Any dose includes exposure on all sarilumab doses.

ANC, absolute neutrophil count; LLN, lower limit of normal; n<sub>c</sub>, number of patients in ANC category; n<sub>i</sub>, number of patients with infection.

**Supplementary table 6** Number of infections and serious infections within 12 weeks after an ANC assessment

| <b>Number of infections within 12 weeks after an ANC assessment</b> | <b>Sarilumab + MTX<br/>(3826.0 PY),<br/>n<sub>E</sub> (n<sub>E</sub>/100 PY)</b> |
|---------------------------------------------------------------------|----------------------------------------------------------------------------------|
| <b>All infections</b>                                               | 1879 (49.1)                                                                      |
| ≥LLN                                                                | 1652 (43.2)                                                                      |
| ≥1500 cells/mm <sup>3</sup> – LLN (grade 1)                         | 152 (4.0)                                                                        |
| ≥1000–<1500 cells/mm <sup>3</sup> (grade 2)                         | 66 (1.7)                                                                         |
| ≥500–<1000 cells/mm <sup>3</sup> (grade 3)                          | 7 (0.2)                                                                          |
| <500 cells/mm <sup>3</sup> (grade 4)                                | 2 (<0.1)                                                                         |
| <b>Serious infections</b>                                           | 130 (3.4)                                                                        |
| ≥LLN                                                                | 125 (3.3)                                                                        |
| ≥1500 cells/mm <sup>3</sup> – LLN (grade 1)                         | 3 (<0.1)                                                                         |
| ≥1000–<1500 cells/mm <sup>3</sup> (grade 2)                         | 0                                                                                |
| ≥500–<1000 cells/mm <sup>3</sup> (grade 3)                          | 1 (<0.1)                                                                         |
| <500 cells/mm <sup>3</sup> (grade 4)                                | 1 (<0.1)                                                                         |

ANC category represents most recent ANC value before onset of infection.

ANC, absolute neutrophil count; LLN, lower limit of normal; n<sub>E</sub>, number of events; n<sub>E</sub>/100 PY, number of events per 100 PY; PY, patient-years.



**Supplementary table 7** ANC and ALT following dose reduction

|                                                    | Before dose reduction* | Time after dose reduction, months† |           |           |
|----------------------------------------------------|------------------------|------------------------------------|-----------|-----------|
|                                                    |                        | ≤1                                 | 2–3       | 4–6       |
| <b>Lowest ANC value (neutropenia grade), n (%)</b> |                        |                                    |           |           |
| No. of patients‡                                   | 108                    | 75                                 | 88        | 101       |
| >LLN                                               | 5 (4.6)                | 27 (36.0)                          | 39 (44.3) | 50 (49.5) |
| ≥1500 cells/mm <sup>3</sup> –LLN (grade 1)         | 13 (12.0)              | 13 (17.3)                          | 16 (18.2) | 20 (19.8) |
| ≥1000 and <1500 cells/mm <sup>3</sup> (grade 2)    | 30 (27.8)              | 24 (32.0)                          | 25 (28.4) | 25 (24.8) |
| ≥500 and <1000 cells/mm <sup>3</sup> (grade 3)     | 60 (55.6)              | 10 (13.3)                          | 8 (9.1)   | 6 (5.9)   |
| <500 cells/mm <sup>3</sup> (grade 4)               | 0                      | 1 (1.3)                            | 0         | 0         |
| <b>Maximum ALT value, n (%)</b>                    |                        |                                    |           |           |
| No. of patients§                                   | 44                     | 25                                 | 37        | 38        |
| ≤ULN                                               | 1 (2.3)                | 4 (16.0)                           | 7 (18.9)  | 13 (34.2) |
| >1× and ≤1.5× ULN                                  | 1 (2.3)                | 5 (20.0)                           | 10 (27.0) | 8 (21.1)  |
| >1.5× and ≤3× ULN                                  | 6 (13.6)               | 9 (36.0)                           | 19 (51.4) | 15 (39.5) |
| >3× and ≤5× ULN                                    | 34 (77.3)              | 6 (24.0)                           | 1 (2.7)   | 2 (5.3)   |
| >5× and ≤10× ULN                                   | 2 (4.5)                | 1 (4.0)                            | 0         | 0         |
| >10× ULN                                           | 0                      | 0                                  | 0         | 0         |

\*Reason for dose reduction for ANC was ANC ≥500–<1000 cells/mm<sup>3</sup> or precautionary measure to avoid ANC <1000 cells/mm<sup>3</sup>, and for ALT was ALT increase to >3× and ≤5× ULN or precautionary measure to avoid ALT increase >3× ULN.

†≤1 month = ≤30 days; 2–3 months = 31–90 days; 4–6 months = 91–180 days.

‡The number of patients who reduced their dose due to ANC reduction and had their ANC measured during the specified period.

§The number of patients who reduced their dose due to ALT increase and had their ALT measured during the specified period.

ALT, alanine aminotransferase; ANC, absolute neutrophil count; LLN, lower limit of normal; ULN, upper limit of normal.

**Supplementary figure 1** Flowchart of patient disposition in the double-blind study and the open-label extension.

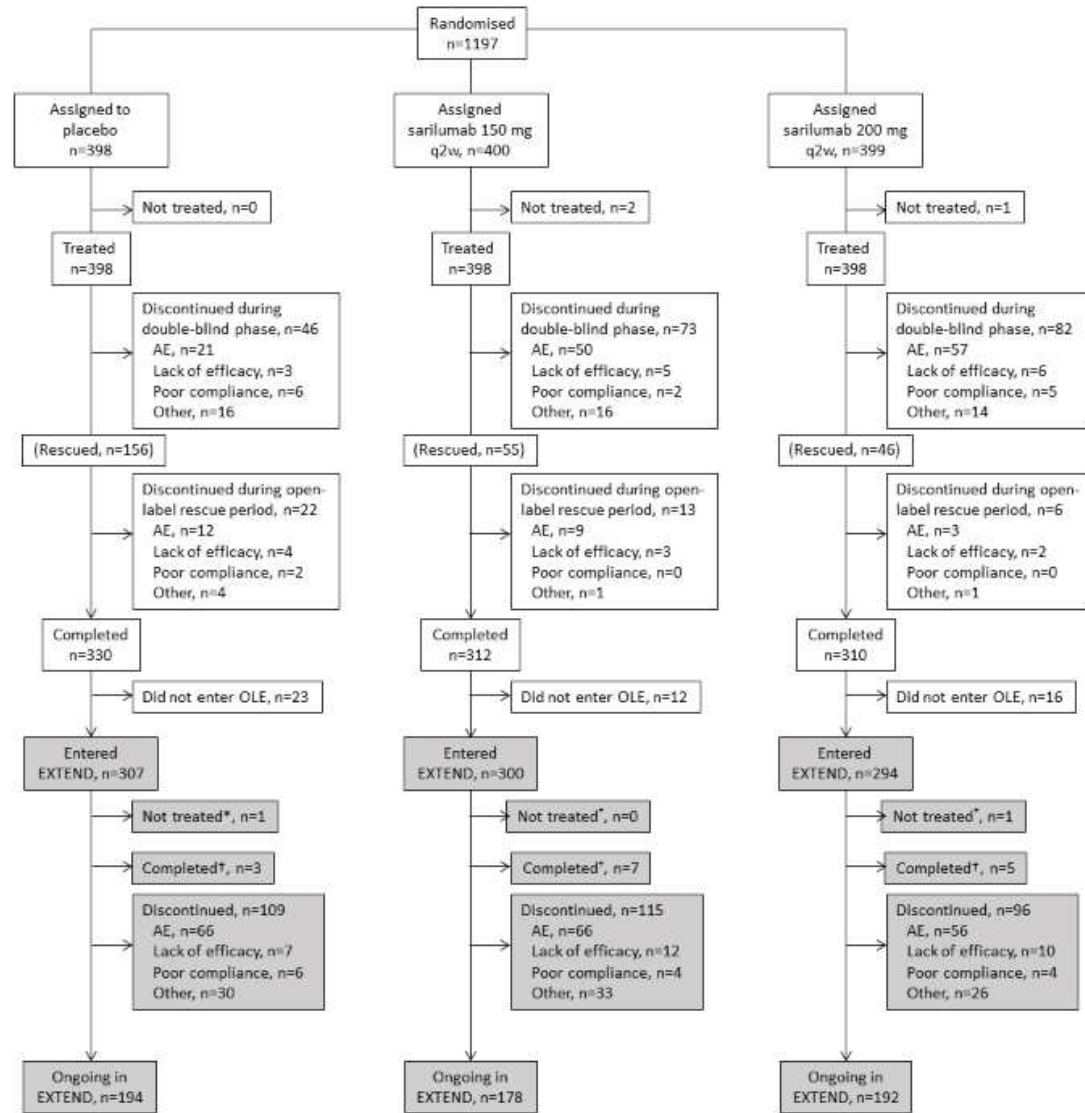

\*Two patients discontinued the study without treatment due to personal reason and AE reason.

†Patients switched to commercially available sarilumab.

AE, adverse event; OLE, open-label extension; q2w, every 2 weeks.

**Supplementary figure 2** Incidence of selected adverse events by 6-month interval (either dose of sarilumab + methotrexate).

### Serious adverse events

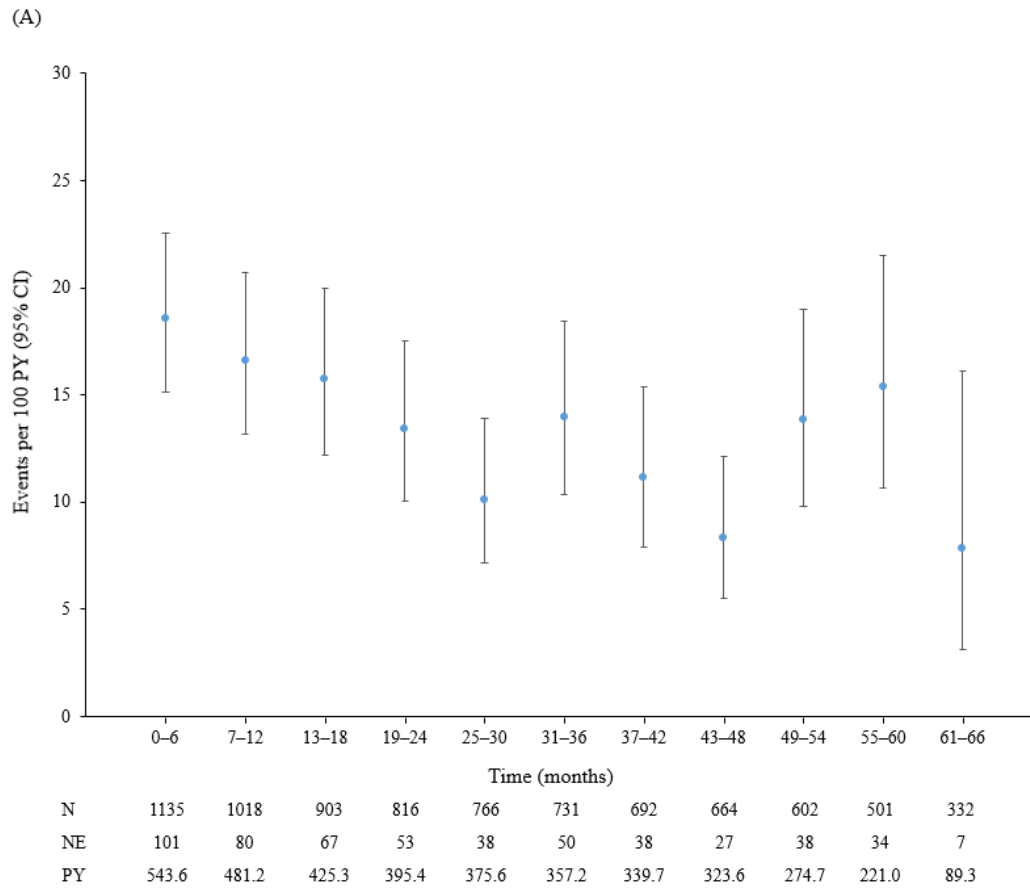

## Serious infections

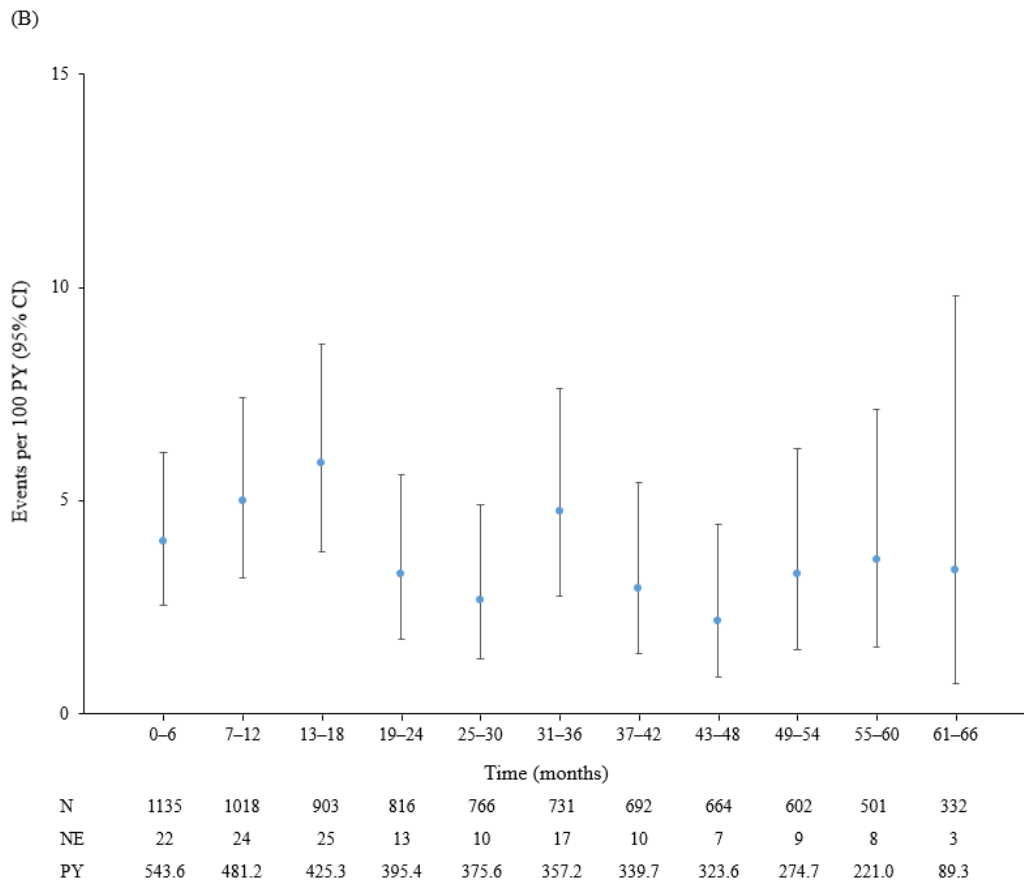

**MACE**

(C)

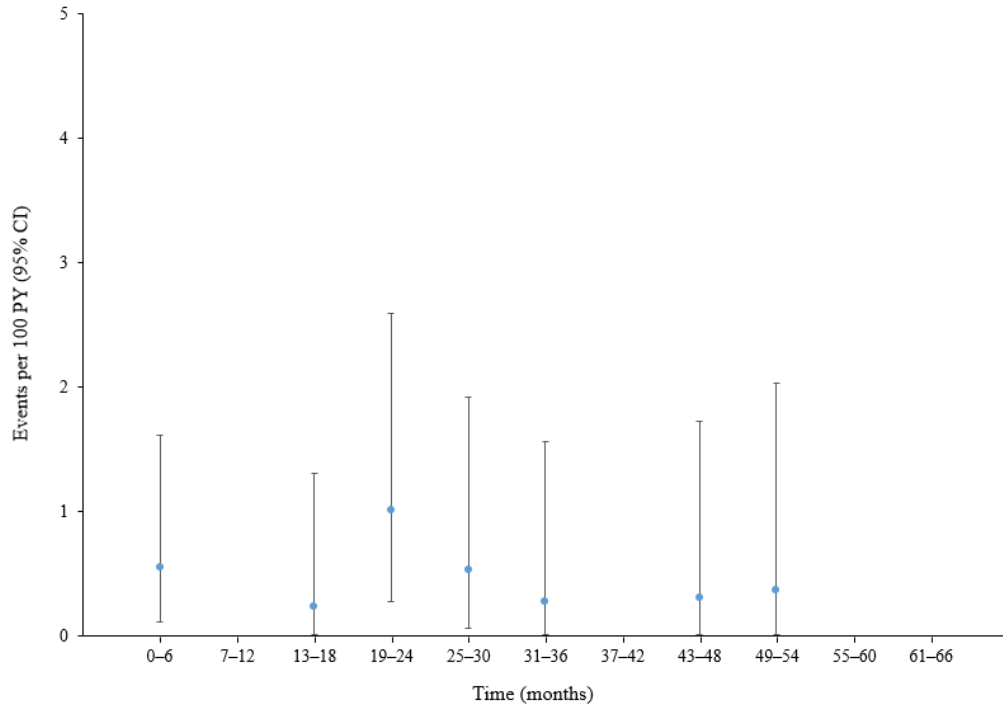

|    | Time (months) |       |       |       |       |       |       |       |       |       |       |
|----|---------------|-------|-------|-------|-------|-------|-------|-------|-------|-------|-------|
|    | 0-6           | 7-12  | 13-18 | 19-24 | 25-30 | 31-36 | 37-42 | 43-48 | 49-54 | 55-60 | 61-66 |
| N  | 1135          | 1018  | 903   | 816   | 766   | 731   | 692   | 664   | 602   | 501   | 332   |
| NE | 3             | 0     | 1     | 4     | 2     | 1     | 0     | 1     | 1     | 0     | 0     |
| PY | 543.6         | 481.2 | 425.3 | 395.4 | 375.6 | 357.2 | 339.7 | 323.6 | 274.7 | 221.0 | 89.3  |

## Injection-site reactions

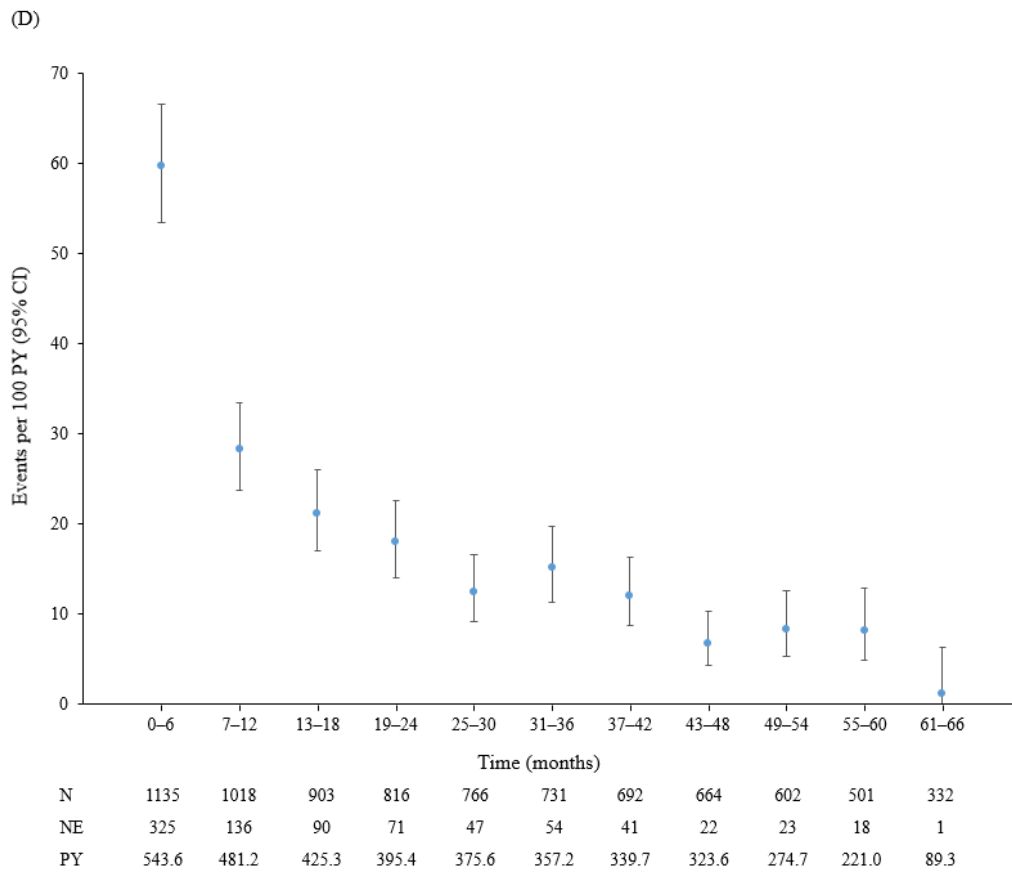

## Malignancy

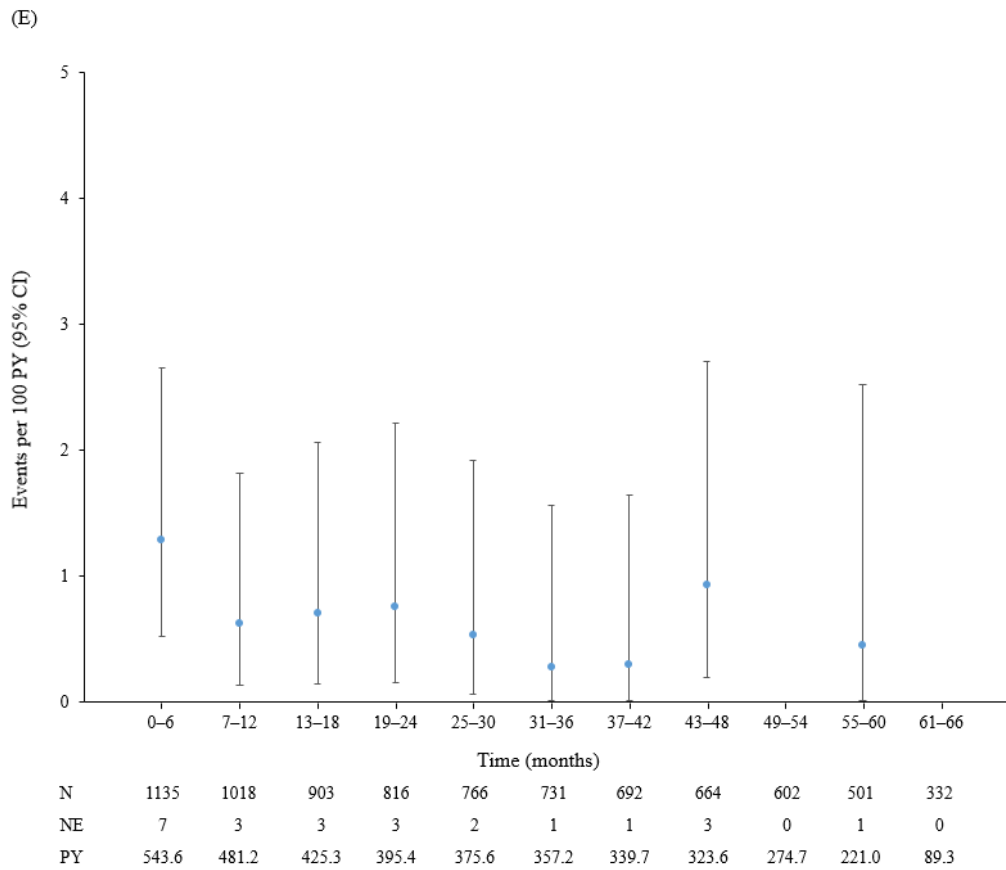

ANC <1000 cells/mm<sup>3</sup>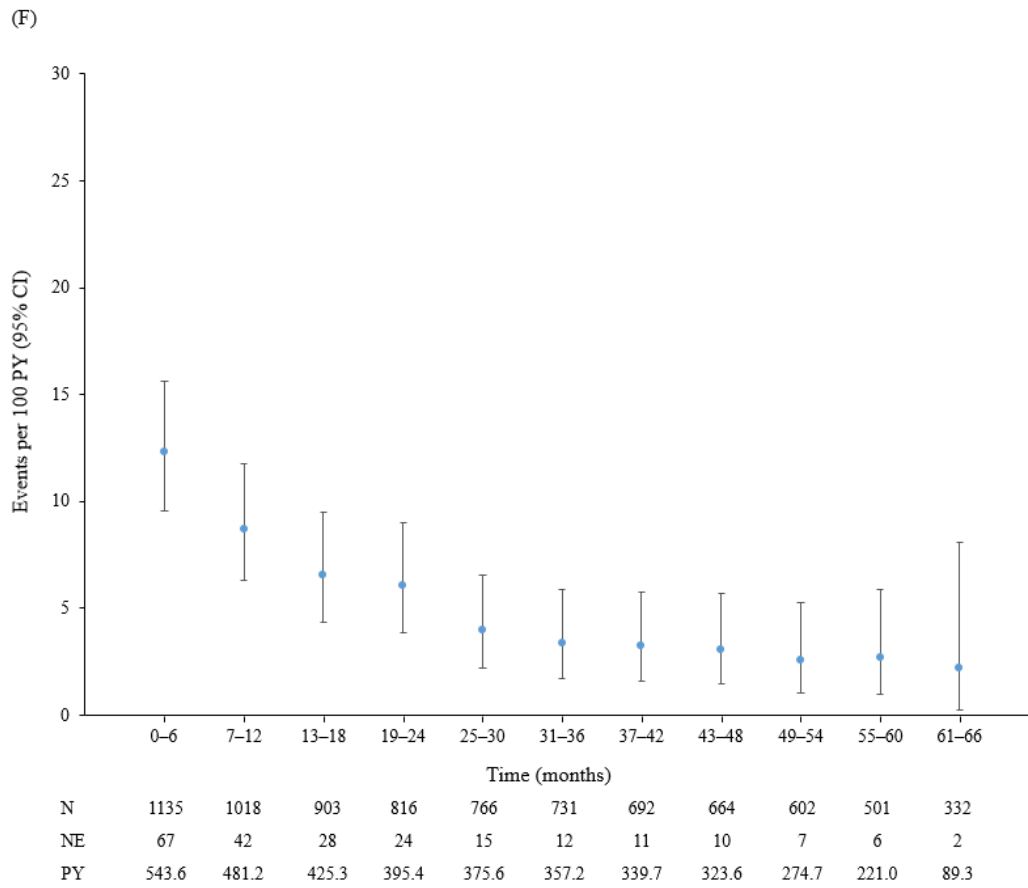



**ALT >3× ULN**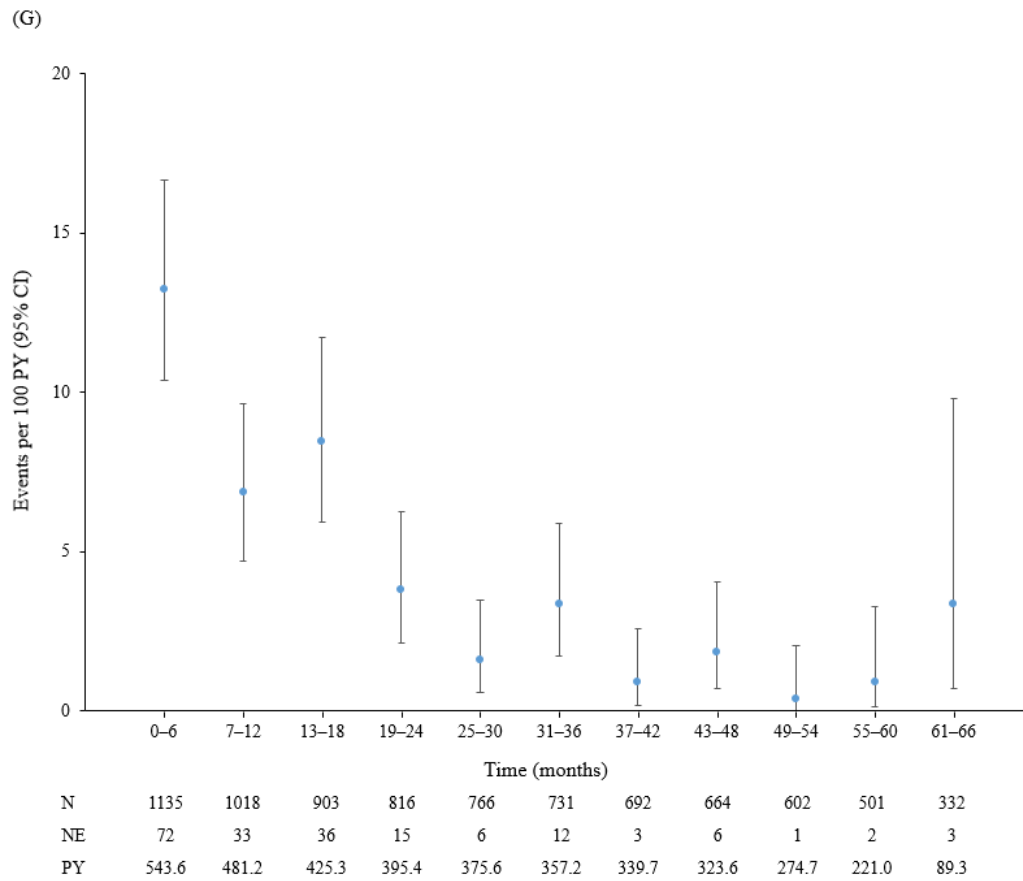

**Platelet count <math>100 \times 10^9 \text{ cells/L}</math>**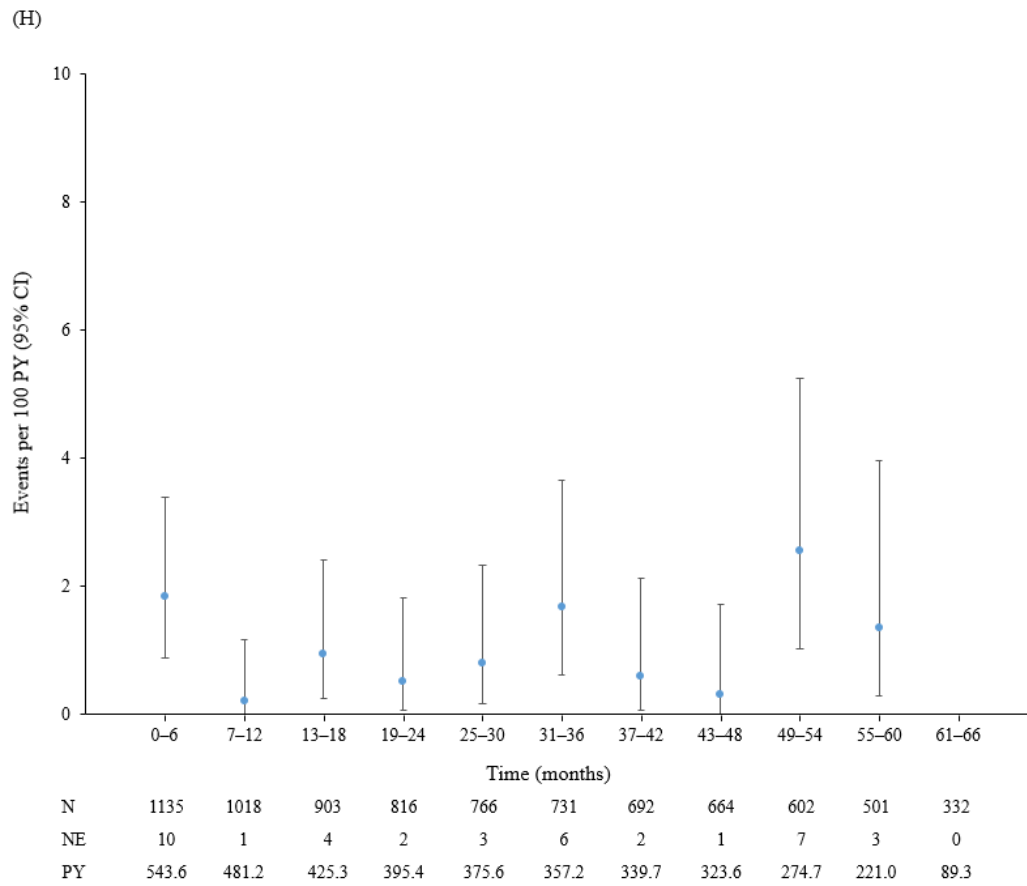

ALT, alanine aminotransferase; ANC, absolute neutrophil count; CI, confidence interval; MACE, major adverse cardiovascular events; NE, number of events; PY, patient-years; ULN, upper limit of normal.

**Supplementary figure 3** Clinical efficacy following sarilumab dose reduction from 200 to 150 mg q2w.

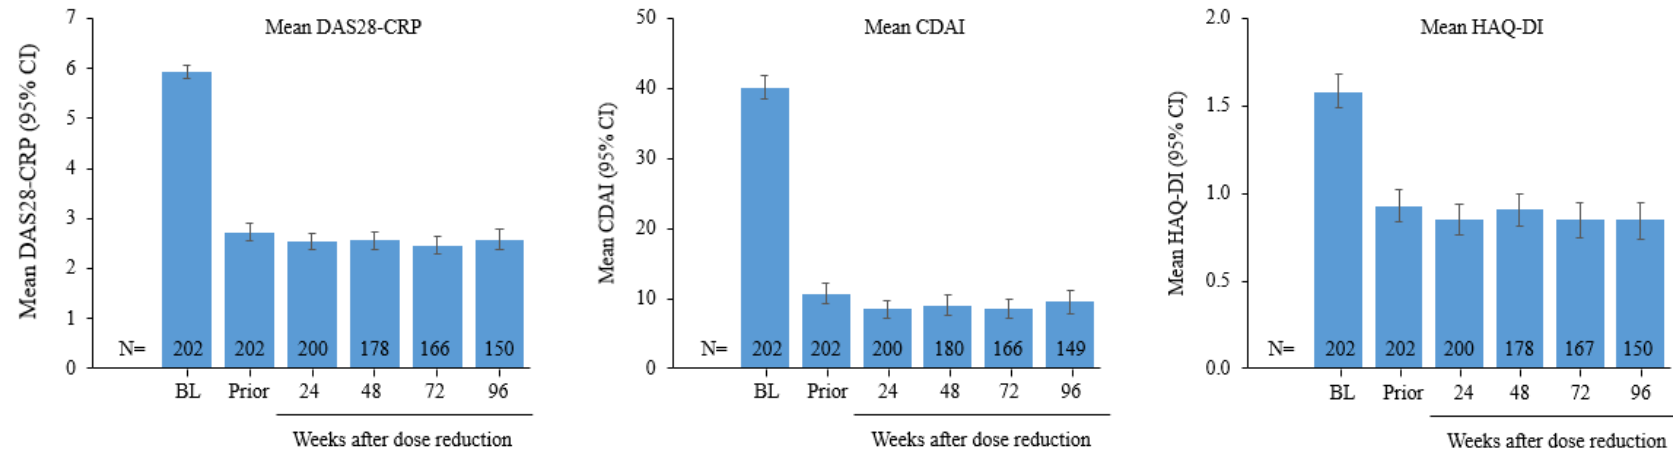

BL, baseline of the double-blind study; CDAI, Clinical Disease Activity Index; CI, confidence interval; DAS28-CRP, Disease Activity Score (28 joints) using C-reactive protein; HAQ-DI, Health Assessment Questionnaire-Disability Index; Prior, most recent assessment before dose reduction in the open-label extension; N, number of patients with dose reduction and assessment at both baseline and the corresponding timepoint; q2w, every 2 weeks.
